# Supplementary material for: A Knockout of the IFITM3 Gene Increases the Sensitivity of WI-38 VA13 Cells to the Influenza A Virus
Source: MDPI journal article supplement (doi:10.3390/ijms25010625), 2024-01-03
Supplement: s1 [file s1]

**Table S1.** Protospacer sequences.

| <b>Guide</b> | <b>Target Sequence</b> | <b>PAM</b> |
|--------------|------------------------|------------|
| gRNA1        | TGAATCACACTGTCCAAACC   | TGG        |
| gRNA2        | GTCAACAGTGGCCAGCCCCC   | AGG        |
| gRNA3        | ACGTCAGTGGCTTTGTCTGT   | GGG        |
| gRNA4        | TGTGGATCACGGTGGACGTC   | GGG        |
| gRNA5        | TGGATCACGGTGGACGTCGG   | GGG        |
| gRNA6-1      | GTGCTGATCTTCCAGGCCTA   | TGG        |
| gRNA6-2      | TAGGCCTGGAAGATCAGCAC   | TGG        |
| gRNA6-3      | AGGCCTGGAAGATCAGCACT   | GGG        |
